# Supplementary material for: Estrogen receptor β upregulated by lncRNA-H19 to promote cancer stem-like properties in papillary thyroid carcinoma
Source: PubMed Central journal article supplement (PMC6214949; doi:10.1038/s41419-018-1077-9), 2018-11-02
Supplement: 41419_2018_1077_MOESM2_ESM.pdf [file 41419_2018_1077_MOESM2_ESM.pdf]

The primers used in RT-qPCR are shown

| Genes                | Forward Primer 5' >3'    | Reverse Primer 5' >3'         |
|----------------------|--------------------------|-------------------------------|
| <i>UCA1</i>          | CTCTCCATTGGGTTCCACCATTC  | GCGGCAGGTCTTAAGAGATGAG        |
| <i>H19</i>           | TACAACCACTGCACTACCTG     | TGGCCATGAAGATGGAGTCG          |
| <i>TC1500845</i>     | ACCACGACTCCCAAGAGGTA     | CAGCTGCGATGGTGAGAACT          |
| <i>TC0101441</i>     | CAAGGCAGGTGAGAACGAGT     | CTCGACTTAGGGAGCTGCAC          |
| <i>ROR</i>           | CCAGGACAATGAAACCAC       | TGGAGCAGGTATGAGATT            |
| <i>MALAT1</i>        | GGATCCTAGACCAGCATGCC     | AAAGGTTACCATAAGTAAGTTCCAGAAAA |
| <i>NEAT1</i>         | CCAGTTTTCCGAGAACCAAA     | ATGCTGATCTGCTGCGTATG          |
| <i>SRA1</i>          | TGATGACATCAGCCGACGCCT    | GCTGCAGATTTCTCTTCATTG         |
| <i>HOTAIR</i>        | CAGTGGGGAACTCTGACTCG     | GTGCCTGGTGCTCTCTTACC          |
| <i>BC200</i>         | AGACCTGCCTGGGCAATATAGC   | GTTGTTGCTTTGAGGGAAGTTACG      |
| <i>RP11-445H22.4</i> | GTAAAGCCATCACCAGGACAACC  | CTCCCTAACAGAAGCCCACCA         |
| <i>TC01000223</i>    | ATGAGGGCTCTGCTCTATGAATGG | GGCTTGTTTCAGTGTCTGTTAAGGGT    |
| <i>TC01001686</i>    | GGCTACTTACATGGTCCAGCA    | TAGCATGGAAAGGACCACTGC         |
| <i>ESR1</i>          | CCACCAACCAGTGCACCATT     | GGTCTTTTCGTATCCCACCTTTC       |
| <i>ESR2</i>          | GTCACTAACTTGGAAGGTGGG    | AGATGTGATAACTGGCGATGG         |
| <i>NANOG</i>         | ACCTATGCCTGTGATTTGTGG    | AGTGGGTTGTTTGCCTTTGG          |
| <i>SOX2</i>          | TCAGGAGTTGTCAAGGCAGAG    | CGCCGCCGATGATTGTTATTA         |

|                |                        |                        |
|----------------|------------------------|------------------------|
| <i>POU5F1</i>  | GTGGAGGAAGCTGACAACAA   | GCCGGTTACAGAACCACACT   |
| <i>TSHR</i>    | TGGTGTGGTTCGTTAGTCTG   | AGTTTGTAGTGGCTGGTGAG   |
| <i>Tg</i>      | TCGTCTTGCCCTTCAGTTTAC  | GTAAATGTGCCTCTTGTGCC   |
| <i>pre-H19</i> | CCCAGAACCCACAACATGAA   | GAGCTGGGTAGCACCATTT    |
| <i>ACTB</i>    | TTGCCGACAGGATGCAGAAGGA | AGGTGGACAGCGAGGCCAGGAT |

### shRNA sequences

| Name            | 5' >3'                 |
|-----------------|------------------------|
| shER $\beta$ -1 | CTCACCATCTAGCCTTAATTC  |
| shER $\beta$ -2 | GGTCGTGTGAAGGATGTAAGG  |
| shH19-1         | GAGTTAGCAAAGGTGACATCT  |
| shH19-2         | GACGTGACAAGCAGGACATGA  |
| shH19-3         | GCACTACCTGACTCAGGAATC  |
| NTC             | TTCTCCGAACGTGTCACGTTTC |

### RNA probe sequences for H19 in FISH assay

| Name             | Forward Primer 5' >3'    | Reverse Primer 5' >3' |
|------------------|--------------------------|-----------------------|
| <i>H19</i> probe | AGCTAGAGGAACCAGACCTCATCA | AATGGAATGCTTGAAGGCTGC |

### siRNA sequences

| Name            | 5'>3'                  |
|-----------------|------------------------|
| siER $\beta$ -1 | GCCCAA AUGUGUUGUGGCCTT |
| siER $\beta$ -2 | UCAUUAUGUCCUUGAAUGCTT  |
| siNC            | UUCUCCGAACGUGUCACGUTT  |

### miRNA mimic

| Name        | 5'>3'                  |
|-------------|------------------------|
| miR-127-5p  | CUGAAGCUCAGAGGGCUCUGAU |
| miR-876-3p  | UGGUGGUUUACAAAGUAAUUCA |
| miR-1976    | CCUCCUGCCCUCCUUGCUGU   |
| miR-3126-5p | UGAGGGACAGAUGCCAGAAGCA |
| miR-3198    | GUGGAGUCCUGGGGAAUGGAGA |
| miR-4268    | GGCUCCUCCUCUCAGGAUGUG  |
| NC          | UUCUCCGAACGUGUCACGUTT  |

### miRNA inhibitor

| Name         | 5'>3'                 |
|--------------|-----------------------|
| miR--3126-5p | UGCUUCUGGCAUCUGUCCUCA |
| NC           | CAGUACUUUUGUGUAGUACAA |

**The primers used in plasmid construction are shown**

| <b>plasmid</b>                                        | <b>Forward Primer 5' &gt;3'</b>                              | <b>Reverse Primer 5' &gt;3'</b>                               |
|-------------------------------------------------------|--------------------------------------------------------------|---------------------------------------------------------------|
| <b>pGL3-H19-WT</b>                                    | ATATGGTACCACAACCCTCACCAAAGGCCAA                              | ATATAAGCTTCTCCCTCACCCCTGCTCCTCG                               |
| <b>pGL3-H19-Del</b>                                   | CGGGGTACCGGTCAACTGGATGGGAATCGG                               | ATATAAGCTTCTCCCTCACCCCTGCTCCTCG                               |
| <b>pGL3-H19-Mut</b>                                   | ACCGGGGTGCCAGCGGCTGTCCGACCTCTG<br>TCGTGCGGAAACCGCGGTG        | GGTCACCGCGGTTTCCGCACGACAGAGGTC<br>GGACAGCCGCTGGGCACCCC        |
| <b>psiCHECK2-ESR2-WT</b>                              | CCGCTCGAGCGCCTGGCCCTGAGGTGAACTG                              | ATAAGAATGCGGCCGCCCAAATGAGGGAC<br>CACACAGCAGAAAGATG            |
| <b>psiCHECK2-ESR2-Mut</b>                             | GGGCTTCATCTTTCTGCTGTGTGTATTTATAT<br>TTGGGCGGCCGCTGGCCGCAATAA | AGATATTTTATTGCGGCCAGCGGCCGCCCA<br>AATATAAATACACACAGCAGAAAGATG |
| <b>pcDNA6b-H19-Mut(miR-3126-5p<br/>binding sites)</b> | GCCGGGCAGGTGAGTCCCTAAAAAACCAGG<br>CCTCGCTTCCCCAGC            | GGGAAGCGAGGCCTGGGTTTTTTAGGGACT<br>CACCTGCCCGGCAGA             |
